# Supplementary material
Source: PubMed Central journal article supplement (PMC4080870)
Supplement: Supp_Table1.pdf [file Supp_Table1.pdf]

**Supplemental Table S1.** Time period over which cohorts of male (M) or female (F) RI families were studied (all mice were obtained from Jackson Laboratories). TT4 levels in the 1<sup>st</sup> and 2<sup>nd</sup> female cohorts correlated significantly ( $r_s$ , Spearman rank correlation coefficient; p value, and the number of sera, n are included).

| RI Set | M/F | Study           | Age (weeks) | Dates             | $r_s$ TT4 | p     | n  | Reference     |
|--------|-----|-----------------|-------------|-------------------|-----------|-------|----|---------------|
| CXB    | M   | -               | 7-9         | 2/2012- 7/2012    |           |       | 13 | Present study |
|        | F   | 2 <sup>nd</sup> | 6-8         | 10/2010 - 2/2011  | 0.76      | 0.002 | 13 | (1)           |
|        | F   | 1 <sup>st</sup> | 5-8         | 1/2005- 9/2005    |           |       | 13 | (2)           |
| BXH    | M   | -               | 7-9         | 2/2012-7/2012     |           |       | 12 | Present study |
|        | F   | 2 <sup>nd</sup> | 6-8         | 8/2010- 4/2011    | 0.60      | 0.036 | 12 | (1)           |
|        | F   | 1 <sup>st</sup> | 5-8         | 6/2006- 12/2006   |           |       | 12 | (3)           |
| AXBXA  | M   | -               | 7-9         | 2/2012- 7/2012    |           |       | 25 | Present study |
|        | F   | 2 <sup>nd</sup> | 6-8         | 2/2011- 6/2011    | 0.62      | 0.001 | 25 | (1)           |
|        | F   | 1 <sup>st</sup> | 5-8         | 8 /2008 to 2/2009 |           |       | 25 | (4)           |

### References

1. Hamidi S, Aliesky H, RW WW, Rapoport B, McLachlan SM 2012 Genetic linkages for thyroxine released in response to TSH stimulation in three sets of recombinant inbred mice provide evidence for shared and novel genes controlling thyroid function. *Thyroid* 23:360-370
2. Aliesky HA, Pichurin PN, Chen CR, Williams RW, Rapoport B, McLachlan SM 2006 Probing the genetic basis for thyrotropin receptor antibodies and hyperthyroidism in immunized CXB recombinant inbred mice. *Endocrinology* 147:2789-2800
3. McLachlan SM, Aliesky HA, Pichurin PN, Chen C-R, Williams RW, Rapoport B 2008 Shared and unique susceptibility genes in a mouse model of Graves' disease determined in BXH and CXB recombinant inbred mice . *Endocrinology* 149:2001-2009
4. McLachlan SM, Aliesky H, Chen C-R, Williams RW, Rapoport B 2011 Exceptional hyperthyroidism and a role for both major histocompatibility class I and class II genes in a murine model of Graves' disease. *PLoS One* 6:e21378
