# Supplementary material
Source: PubMed Central journal article supplement (PMC4080870)
Supplement: Supp_Table2.pdf [file Supp_Table2.pdf]

**Supplemental Table S2.** Differences in chromosomal linkage between male and female for **FT4** in AXBXA, CXB and BXH recombinant inbred mouse strains. Suggestive or significant (bold) LRS values are given together with locations of loci (megabases, Mb), corresponding human Chr and genes or associations. In the absence of suggestive linkage, the highest LRS values are in parentheses.

| Strain       | Chr       | Males           |          | Females |             | Genes/      | Hu       |
|--------------|-----------|-----------------|----------|---------|-------------|-------------|----------|
|              |           | LRS             | Mb       | LRS     | Mb          | Assoc.      | Chr      |
| <b>AXBXA</b> |           |                 |          |         |             |             |          |
| n=26 M       | <b>7</b>  | <b>24.292 *</b> | 141.8777 |         |             | Adam 12     | 10       |
| n=15 F       | <b>2</b>  |                 |          | 20.315  | 106.731     | FSH $\beta$ | 11p13    |
| <b>CXB</b>   |           |                 |          |         |             |             |          |
| n=13 M       | <b>1</b>  | (12.588)        | 76.52483 |         |             |             | 2q36.1   |
|              |           |                 | 78.16416 |         |             |             | 2q35-q37 |
|              |           |                 |          | (9.24)  | 82.218      |             |          |
|              | <b>11</b> | (12.588)        | 92.910   |         |             |             | 17q22    |
|              |           |                 | 92.925   |         |             |             |          |
| n=13 F       | <b>13</b> |                 |          | 15.37   | 103.442     |             | 5q14.3   |
|              |           |                 |          |         | 104.230     |             | 5q12     |
|              | <b>19</b> |                 |          | 15.37   | 23.66134    |             | 9q21.12  |
|              |           |                 |          |         | 25.41081    |             | 9p24.3   |
| <b>BXH</b>   |           |                 |          |         |             |             |          |
| n=10 M       | <b>4</b>  | (11.261)        | 57.44278 |         |             |             |          |
|              |           |                 | 57.62658 |         |             |             |          |
| n=10 F       | <b>1</b>  |                 |          | 14.729  | 157.5889 to |             |          |
|              |           |                 |          |         | 179.1997    | Akt3        |          |
|              | <b>18</b> |                 |          | 14.729  | 69.19244    |             | 18q21.2  |
|              |           |                 |          |         | 77.06523    |             | 18q21.1  |

**Notes:** \* Determined using SD. GeneNetwork trait numbers for FT4 in males: CXB 10744; AXBXA 10276; BXH 10275; data for female CXB, BXH and AXBXA from Ref. 1. **Abbreviations:-** **Chr 1:** Akt3, thymoma viral proto-oncogene 3 (178.95224 Mb); **Chr 2:** FSH $\beta$ , follicle stimulating hormone  $\beta$  (106.8963 Mb); **Chr 7:** Adam 12, a disintegrin and metalloprotein (141.074882 Mb);

**Reference 1.** McLachlan SM, Lu L, Aliesky HA, Williams RW, Rapoport B 2011. Distinct genetic signatures for variability in total and free serum thyroxine levels in four sets of recombinant inbred mice. *Endocrinology* **152**:1172-1179.
