# Supplementary material
Source: PubMed Central journal article supplement (PMC4080870)
Supplement: Supp_Table3.pdf [file Supp_Table3.pdf]

**Supplemental Table S3. Differences** in chromosomal (Chr) linkage for **TT4** between male and female BXH strains. Suggestive LRS values are shown with the locations of loci (megabases, Mb), the closest gene (regardless of function), the corresponding human Chr and the number of male (M) or female (F) strains studied.

| Strain | Males |        |          | Females |         | Genes   | Hu     |
|--------|-------|--------|----------|---------|---------|---------|--------|
|        | Chr   | LRS    | Mb       | LRS     | Mb      |         |        |
| n=12 M | 1     | 13.507 | 136.1073 |         |         |         | 2      |
|        |       |        | 136.6445 |         |         | Irs1    | 2      |
|        |       |        | 136.7667 |         |         | Adipor1 | 1q32.1 |
|        |       |        | 137.7065 |         |         |         |        |
| n=13 F | 13    |        |          | 15.047  | 112.561 | **      | 5q14.3 |
|        |       |        |          |         | 114.048 | ^       | 5q12   |

GeneNetwork numbers for TT4 in male mice: BXH 10170; female mice from Ref. 1). **Abbreviations:** Adipor1, adiponectin receptor 1 (136.312043 Mb); Irs1, insulin receptor substrate 1(82.229679 Mb); \*\* up- and ^ downstream of loci linked to TSH levels in humans (Pde8b and Pde4b, phosphodiesterase 8B and 4,B 95.79446 and 109.77500 Mb, respectively)(Ref. 3).

#### References

1. **McLachlan SM, Aliesky HA, Pichurin PN, Chen C-R, Williams RW, Rapoport B** 2008 Shared and unique susceptibility genes in a mouse model of Graves' disease determined in BXH and CXB recombinant inbred mice . Endocrinology 149:2001-2009
2. **Arnaud-Lopez L, Usala G, Ceresini G, Mitchell BD, Pilia MG, Piras MG, Sestu N, Maschio A, Busonero F, et al** 2008 Phosphodiesterase 8B gene variants are associated with serum TSH levels and thyroid function. Am J Hum Genet 82:1270-1280
